# Supplementary material for: Enhanced osteo–angiogenic coupling by a bioactive cell-free fat extract (CEFFE) delivered through electrospun fibers
Source: Royal Society of Chemistry journal article supplement (doi:10.1039/d4tb01394h), 2024-11-28
Supplement: d4tb01394h1.pdf [file d4tb01394h1.pdf]

## Supporting Information

### Enhanced osteo-angiogenic coupling by a bioactive cell-free fat extract (CEFFE) delivered through electrospun fibers

Donghong Li <sup>a</sup>, Tingting Xu <sup>a</sup>, Xiaoli Wang <sup>a</sup>, Qiong Xiao <sup>a</sup>, Wenjie Zhang <sup>b</sup>,  
Fen Li <sup>c</sup>, Hao Zhang <sup>c</sup>, Bei Feng <sup>c\*</sup>, and Yanzhong Zhang <sup>a, d\*</sup>

<sup>a</sup> College of Biological Science and Medical Engineering, Donghua University,  
Shanghai 201620, China

<sup>b</sup> Department of Plastic and Reconstructive Surgery, Shanghai Key Laboratory of  
Tissue Engineering, Shanghai Ninth People's Hospital affiliated to Shanghai Jiao  
Tong University School of Medicine, Shanghai 200011, China

<sup>c</sup> Heart Center and Shanghai Institute of Pediatric Congenital Heart Disease, Shanghai  
Children's Medical Center, School of Medicine, Shanghai Jiao Tong University,  
Shanghai 200127, China

<sup>d</sup> Shanghai Engineering Research Center of Nano-Biomaterials and Regenerative  
Medicine, Donghua University, Shanghai 201620, China

\* Correspondence should be addressed to:

**Yanzhong Zhang, Ph.D.**

College of Biological Science and Medical Engineering, Donghua University, 2999  
North Renmin Road, Shanghai 201620, China

Tel: +86-21-6779 2374; ORCID: 0000-0002-2663-1279

Email: [yzzhang@dhu.edu.cn](mailto:yzzhang@dhu.edu.cn)

**Bei Feng, Ph.D.**

Heart Center and Shanghai Institute of Pediatric Congenital Heart Disease, Shanghai  
Children's Medical Center, School of Medicine, Shanghai Jiao Tong University, 1678  
Dongfang Road, Shanghai 200127, China.

Tel: +86-21-3862 6161; ORCID: 0000-0002-8476-8628

Email: [fengbei@scmc.com.cn](mailto:fengbei@scmc.com.cn)

## qRT-PCR

**Table S1** shows the forward and reverse primers used for the gene expression analysis, as described in **Section 2.3.6** of the main text.

**Table S1.** Primer sequences of osteogenesis-related genes for qRT-PCR

| Gene          | Forward primer sequence (5'-3') | Reverse primer sequence (5'-3') |
|---------------|---------------------------------|---------------------------------|
| <i>GAPDH</i>  | CAAGCTCATTTCTGGTATGACAAT        | GTTGGGATAGGGCCTCTCTTG           |
| <i>Colla1</i> | TTCCTGAAGATGTCGTTGATGTG         | TGTTTTGCAGTGGTATGTGTAATGTTT     |
| <i>Runx-2</i> | GACTGTGGTTACCGTCATGGC           | ACTTGGTTTTTCATAACAGCGGA         |
| <i>OPN</i>    | AGAGCGGTGAGTCTAAGGAGT           | TGCCCTTCCGTTGTTGTCC             |
| <i>OCN</i>    | GAACAGACAAGTCCCACACAGC          | TCAGCAGAGTGAGCAGAAAAGAT         |

## MTT assay

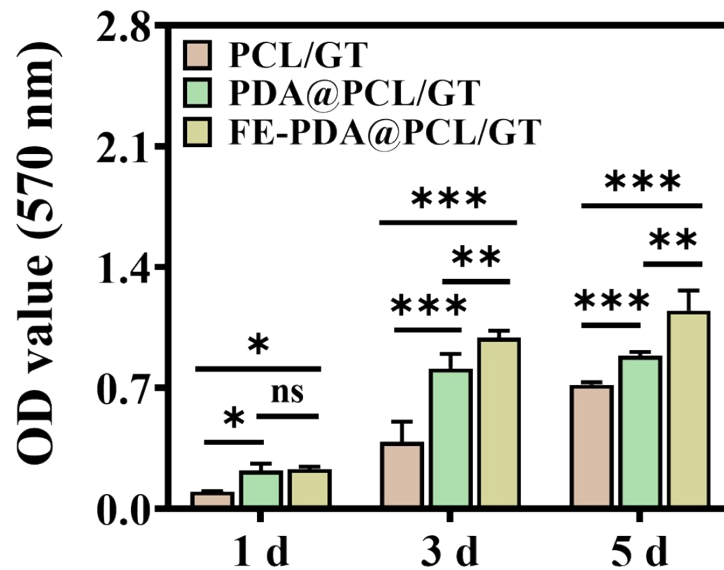

**Figure S1.** Proliferation of MC3T3-E1 cells cultured on the fibrous scaffolds of PCL/GT, PDA@PCL/GT, and FE-PDA@PCL/GT for 1, 3, 5 days, n=4.

The 3-(4,5-dimethylthiazol-2-yl)-2,5-diphenyltetrazolium bromide (MTT) assay (Beyotime, China) was performed to assess cell proliferation. Briefly, MC3T3-E1 cells at a density of  $1.0 \times 10^4$  cells per well were seeded on the fibrous scaffolds of PCL/GT,

PDA@PCL/GT, and FE-PDA@PCL/GT in 24-well culture plates. After culturing for 1, 3, and 5 days, 500  $\mu\text{L}$  of working medium, prepared by diluting MTT in medium at a volume ratio of 1:10, was added to each well and incubated at 37  $^{\circ}\text{C}$  for 4 h. Next, 500  $\mu\text{L}$  of formazan lysis solution was introduced to each well followed by continuous incubation until the formazan was completely dissolved. Lastly, 100  $\mu\text{L}$  volume of the solution was transferred to a 96 well plate reader (MK3, Thermo, USA) for absorbance measurements at 570 nm. **Figure S1** shows that while all the fibrous scaffolds supported the MC3T3-E1 cells' proliferation, cells cultured on the FE-PDA@PCL/GT exhibited the most pronounced proliferative ability.

## 2D collective cell migration assay

An “artificial wound” method <sup>1</sup> was used to examine the collective cell migration of MC3T3-E1 cells. Briefly, stainless-steel rings ( $\phi = 15$  mm) with 1 mm thickness of barrier bar in the middle were placed on the fibrous scaffolds of PCL/GT, PDA@PCL/GT, and FE-PDA@PCL/GT in 24-well plates. MC3T3-E1 cells, prior stained with CellTracker Red CMFDA (MKBio, China), were then seeded at seeding density of  $5.0 \times 10^5$  cells per well. After 3 days of culturing, the rings were removed to initiate cell invading to the cell-free area for 24 h. Thereafter, the cells were fixed with 4% paraformaldehyde for observation and the cell migration rate was determined by:

$$\text{Cell migration rate } (\mu\text{m h}^{-1}) = \frac{S_0 - S_t}{2Lt} \quad (1)$$

where  $S_0$  and  $S_t$  are the areas of cell-free region before and after cell migration, respectively;  $L$  is the width of the analyzed images and  $t$  is the period of time for cell migration (24 h).

It was found that cells migrated into the denuded area was most effective for the FE-PDA@PCL/GT group (**Figure S2A**). Quantified migration rate of cells on the fibrous substrates were in the order of FE-PDA@PCL/GT ( $6.03 \pm 0.04 \mu\text{m h}^{-1}$ ) > PCL/GT

( $5.61 \pm 0.07 \mu\text{m h}^{-1}$ ) > PDA@PCL/GT ( $5.48 \pm 0.04 \mu\text{m h}^{-1}$ ), with statistically significant differences between the FE-PDA@PCL/GT group and the other two groups

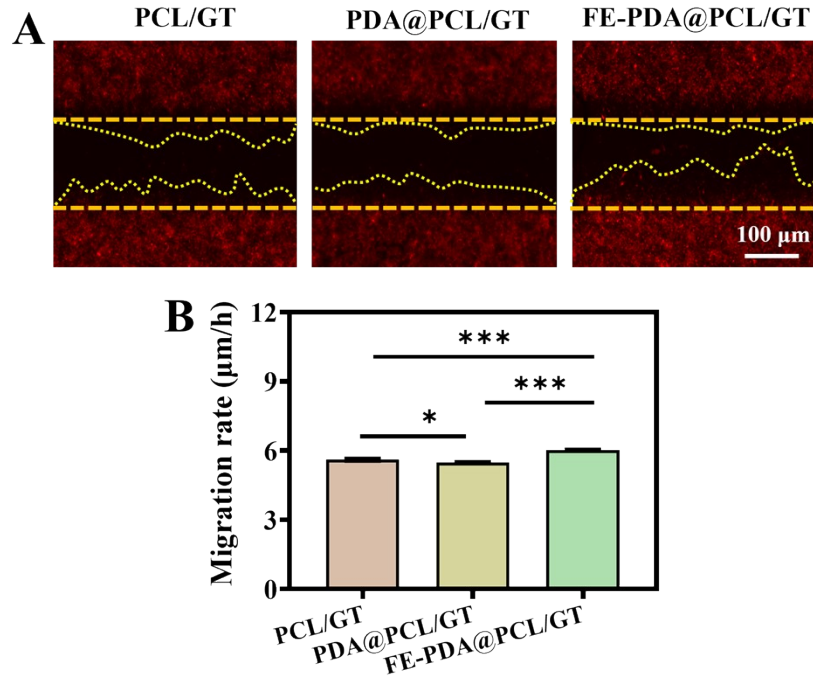

(Figure S2B).

**Figure S2.** (A) Collective cell migration by “wound healing” assay, with the two parallel orange dashed lines showing the initial cell-free zones and the two wave-like yellow dotted lines showing the frontiers of cell migration; (B) Quantified cell migration rate in (A), n=5.

### mRNA expression of angiocrine factors in huVECs

huVECs ( $5.0 \times 10^4$  cells per well) were seeded on the fibrous scaffolds of PCL/GT, PDA@PCL/GT, and FE-PDA@PCL/GT in 24-well plates (Figure S3A). After 3 days of culture, qRT-PCR was performed to detect mRNA expression of angiocrine factors including bone morphogenetic protein-2 (*BMP-2*), bone morphogenetic protein-7 (*BMP-7*), Wnt family member 1 (*Wnt1*), and Wnt family member 5a (*Wnt5a*) in huVECs. Total RNA isolation, cDNA synthesis, and qRT-PCR were conducted in accordance with the protocol detailed in Section 2.3.6 of the main text. Gene expression level was normalized to the endogenous housekeeping GAPDH. The forward and

reverse primers for the selected genes are listed in **Table S2**.

The results showed that the expression of osteogenesis-related genes was significantly upregulated for the cells cultured on the FE-PDA@PCL/GT, with the levels of *BMP-2*, *BMP-7*, and *Wnt1* genes being 1.5-, 1.3-, and 1.2-fold higher than that in the PCL/GT group, respectively (**Figure S3B**). This finding is consistent with previous studies, showing that ECs secreted some angiocrine factors with osteogenic property, such as Notch, WNT, and BMP<sup>2-4</sup>.

**Table S2.** Primer sequences of osteogenesis-related genes

| Gene         | Forward primer sequence (5'-3') | Reverse primer sequence (5'-3') |
|--------------|---------------------------------|---------------------------------|
| <i>GAPDH</i> | GGACCTGACCTGCCGTCTAG            | GTAGCCCAGGATGCCCTTGA            |
| <i>BMP-2</i> | ACCCGCTGTCTTCTAGCGT             | TTTCAGGCCGAACATGCTGAG           |
| <i>BMP-7</i> | TCGGCACCCATGTTTCATGC            | GAGGAAATGGCTATCTTGCAGG          |
| <i>Wnt1</i>  | CGATGGTGGGGTATTGTGAAC           | CCGGATTTTGGCGTATCAGAC           |
| <i>Wnt5a</i> | ATTCTTGGTGGTCGCTAGGTA           | CGCCTTCTCCGATGTACTGC            |

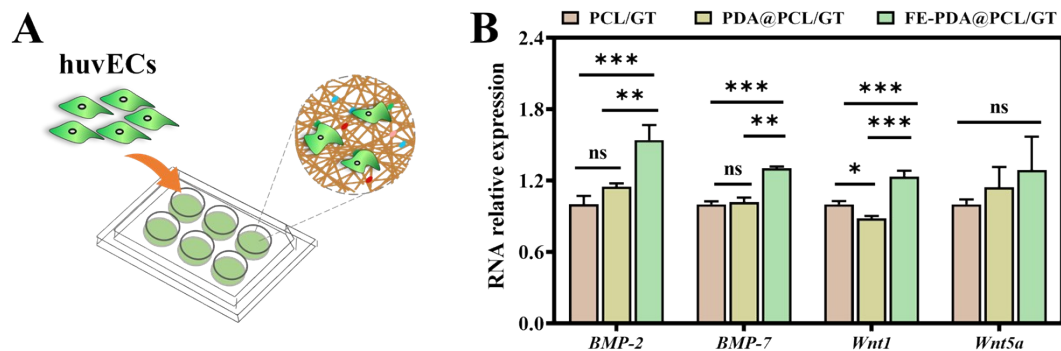

**Figure S3.** Fibrous FE-PDA@PCL/GT scaffold promoted the mRNA expression of osteogenic factors in hUVECs: (A) hUVECs were seeded onto fibrous scaffolds of PCL/GT, PDA@PCL/GT and FE-PDA@PCL/GT for 3 days of culturing; (B) Gene expression of *BMP-2*, *BMP-7*, *Wnt1* and *Wnt5a*, n=3.

#### mRNA expression of angiogenic factors

MC3T3-E1 cells ( $5.0 \times 10^4$  cells per well) were seeded on the fibrous scaffolds of PCL/GT, PDA@PCL/GT, and FE-PDA@PCL/GT in 24-well plates (**Figure S4A**). After 3 days of culture, qRT-PCR was performed to detect mRNA expression of

angiogenic factors including stromal cell-derived factor-1 $\alpha$  (*SDF-1 $\alpha$* ), C-X-C chemokine receptor type 4 (*CXCR4*), vascular endothelial growth factor (*VEGF*) and basic fibroblast growth factor (*bFGF*) in MC3T3-E1 cells. Total RNA isolation, cDNA synthesis, and qRT-PCR were conducted in accordance with the protocol detailed in **Section 2.3.6** of the main text. Gene expression level was normalized to the endogenous housekeeping GAPDH. The forward and reverse primers for the selected genes are listed in **Table S3**.

It was found that gene expression for the cells cultured on FE-PDA@PCL/GT was the highest compared to the counterpart groups. In particular, the expression levels of bFGF and VEGF in the FE-PDA@PCL/GT group were increased by 165% and 296%, respectively, compared with the PCL/GT group. Presence of FE thus significantly promoted the expression of angiogenic factors in osteoblasts. This is consistent with the previous reports showing that pro-angiogenic factors secreted by osteoblasts affected angiogenesis<sup>5-7</sup>.

**Table S3.** Primer sequences of angiogenesis-related genes

| Gene                            | Forward primer sequence (5'-3') | Reverse primer sequence (5'-3') |
|---------------------------------|---------------------------------|---------------------------------|
| <i>GAPDH</i>                    | CAAGCTCATTTCCTGGTATGACAAT       | GTTGGGATAGGGCCTCTCTTG           |
| <i>bFGF</i>                     | GCGACCCACACGTCAAACATA           | CCGTCCATCTTCCTTCATAGC           |
| <i>CXCR4</i>                    | GACTGGCATAAGTCGGCAATG           | AGAAGGGGAGTGTGATGACAAA          |
| <i>SDF-1<math>\alpha</math></i> | TGCATCAGTGACGGTAAACCA           | CACAGTTTGGAGTGTGAGGAT           |
| <i>VEGF</i>                     | GCACATAGAGAGAATGAGCTTCC         | CTCCGCTCTGAACAAGGCT             |

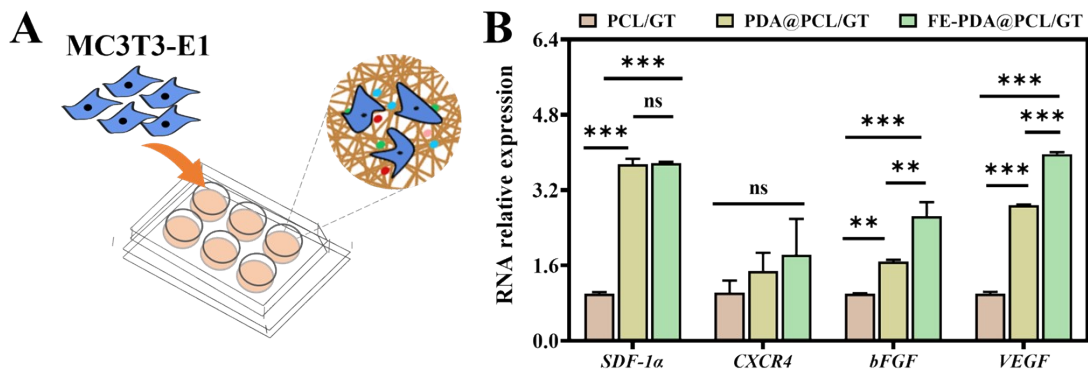

**Figure S4.** Fibrous FE-PDA@PCL/GT scaffold promoted mRNA expression of pro-angiogenic factors in MC3T3-E1 cells: (A) Cells were seeded onto fibrous scaffolds of

PCL/GT, PDA@PCL/GT and FE-PDA@PCL/GT for 3 days of culturing; (B) Gene expression of *SDF-1 $\alpha$* , *CXCR4*, *bFGF* and *VEGF*, n=3.

## References

- [1] Yi, B. C.; Shen, Y. B.; Tang, H.; Wang, X. L.; Li, B.; Zhang, Y. Z., Stiffness of aligned fibers regulates the phenotypic expression of vascular smooth muscle cells. *ACS Appl. Mater. Interfaces* 2019, **11**, 6867-6880.
- [2] Zhu, S. P.; Bennett, S.; Kuek, V.; Xiang, C.; Xu, H. Z.; Rosen, V.; Xu, J. K., Endothelial cells produce angiocrine factors to regulate bone and cartilage via versatile mechanisms. *Theranostics* 2020, **10**, 5957-5965.
- [3] Bouletreau, P. J.; Warren, S. M.; Spector, J. A.; Peled, Z. M.; Gerrets, R. P.; Greenwald, J. A.; Longaker, M. T., Hypoxia and VEGF up-regulate BMP-2 mRNA and protein expression in microvascular endothelial cells: implications for fracture healing. *Plast. Reconstr. Surg.* 2002, **109**, 2384-2397.
- [4] Yuan, K.; Shamskhou, E. A.; Orcholski, M. E.; Nathan, A.; Reddy, S.; Honda, H.; Mani, V.; Zeng, Y. T.; Ozen, M. O.; Wang, L. L.; Demirci, U.; Tian, W.; Nicolls, M. R.; Perez, V. A. D., Loss of endothelium-derived Wnt5a is associated with reduced pericyte recruitment and small vessel loss in pulmonary arterial hypertension. *Circulation* 2019, **139**, 1710-1724.
- [5] Goad, D. L.; Rubin, J.; Wang, H.; Tashjian, A. H.; Patterson, C., Enhanced expression of vascular endothelial growth factor in human SaOS-2 osteoblast-like cells and murine osteoblasts induced by insulin-like growth factor I. *Endocrinology* 1996, **137**, 2262-2268.
- [6] Sobue, T.; Gravely, T.; Hand, A.; Min, Y. K.; Pilbeam, C.; Raisz, L. G.; Zhang, X.; Larocca, D.; Florkiewicz, R.; Hurley, M. M., Regulation of fibroblast growth factor 2 and fibroblast growth factor receptors by transforming growth factor  $\beta$  in human osteoblastic MG-63 cells. *J. Bone Miner. Res.* 2002, **17**, 502-512.
- [7] Chim, S. M.; Tickner, J.; Chow, S. T.; Kuek, V.; Guo, B. S.; Zhang, G.; Rosen, V.; Erber, W.; Xu, J. K., Angiogenic factors in bone local environment. *Cytokine Growth Factor Rev.* 2013, **24**, 297-310.
